# Supplementary material for: Global and single-cell proteomics view of the co-evolution between neural progenitors and breast cancer cells in a co-culture model
Source: PubMed Central journal article supplement (PMC11404160; doi:10.1016/j.ebiom.2024.105325), 2024-09-04

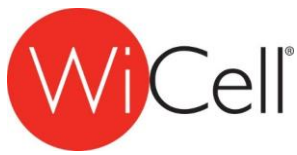

## Thaw and Culture Details

|                                  |                                                                                                                                                                                                                                                                                                                                                                                                            |
|----------------------------------|------------------------------------------------------------------------------------------------------------------------------------------------------------------------------------------------------------------------------------------------------------------------------------------------------------------------------------------------------------------------------------------------------------|
| Cell Line Name                   | <b>WA09</b>                                                                                                                                                                                                                                                                                                                                                                                                |
| WiCell Lot Number                | <b>WB66446</b>                                                                                                                                                                                                                                                                                                                                                                                             |
| Parent Material                  | WA09-MCB-01                                                                                                                                                                                                                                                                                                                                                                                                |
| Provider                         | University of Wisconsin – Dr. James Thomson                                                                                                                                                                                                                                                                                                                                                                |
| Banked By                        | WiCell                                                                                                                                                                                                                                                                                                                                                                                                     |
| Thaw and Culture Recommendations | WiCell recommends thawing 1 vial into 1 well of a 6 well plate. WiCell recommends only collagenase passaging.                                                                                                                                                                                                                                                                                              |
| Culture Platform                 | Feeder Dependent                                                                                                                                                                                                                                                                                                                                                                                           |
|                                  | Medium: hESC Medium (KOSR)                                                                                                                                                                                                                                                                                                                                                                                 |
|                                  | Matrix: MEF                                                                                                                                                                                                                                                                                                                                                                                                |
| Protocol                         | WiCell Feeder Dependent Protocol                                                                                                                                                                                                                                                                                                                                                                           |
| Passage Number                   | p28<br>These cells were cultured for 27 passages prior to freeze and post reprogramming. WiCell adds +1 to the passage number to best represent the overall passage number of the cells at thaw.                                                                                                                                                                                                           |
| Date Vialied                     | 20-July-2017                                                                                                                                                                                                                                                                                                                                                                                               |
| Vial Label                       | WA09<br>p28<br>WB66446                                                                                                                                                                                                                                                                                                                                                                                     |
| Biosafety and Use Information    | Appropriate biosafety precautions should be followed when working with these cells. The end user is responsible for ensuring that the cells are handled and stored in an appropriate manner. WiCell is not responsible for damages or injuries that may result from the use of these cells.<br>Cells distributed by WiCell are intended for research purposes only and are not intended for use in humans. |

## Testing Performed by WiCell

| Test Description               | Test Provider                                                 | Test Method                       | Test Specification                                                                                                                        | Result |
|--------------------------------|---------------------------------------------------------------|-----------------------------------|-------------------------------------------------------------------------------------------------------------------------------------------|--------|
| Karyotype by G-banding         | WiCell                                                        | SOP-CH-003                        | Expected karyotype                                                                                                                        | Pass   |
| Post-Thaw Viable Cell Recovery | WiCell                                                        | SOP-CH-305                        | ≥ 15 Undifferentiated Colonies,<br>≤ 30% Differentiation and recoverable attachment after passage<br>Recoverable attachment after passage | Pass   |
| Identity by STR                | UW Translational Research Initiatives in Pathology Laboratory | PowerPlex 16 HS System by Promega | Consistent with known profile                                                                                                             | Pass   |
| Sterility                      | Biotest Laboratories                                          | ST/07                             | Negative                                                                                                                                  | Pass   |
| Mycoplasma                     | WiCell                                                        | SOP-QU-004                        | Negative                                                                                                                                  | Pass   |

| Approval Date  | Quality Assurance Approval                                                                                                                                                          |
|----------------|-------------------------------------------------------------------------------------------------------------------------------------------------------------------------------------|
| 28-August-2017 | <div style="text-align: right;">9/6/2017</div> <div style="text-align: center;">           X AMK<br/> <small>AMK<br/>Quality Assurance<br/>Signed by Klade, Anjelica</small> </div> |

**Date Reported:** Friday, August 18, 2017

**Cell Line:** WA09-WB66446 12683

**Passage#:** 29

**Date of Sample:** 8/8/2017

**Specimen:** Human ESC

**Results:** 46,XX

**Cell Line Gender:** Female

**Reason for Testing:** lot release testing

**Investigator:** [REDACTED], WiCell CDM

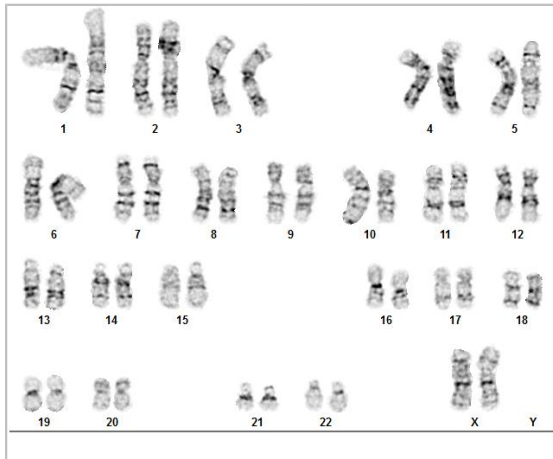

**Cell:** 34

**Slide:** G03

**Slide Type:** Karyotype

**Total Counted:** 20

**Total Analyzed:** 8

**Total Karyogrammed:** 4

**Band Resolution:** 425 - 475

### Interpretation:

**This is a normal karyotype. No clonal abnormalities were detected at the stated band level of resolution.**

**Completed by:** [REDACTED], CG(ASCP)

**Reviewed and Interpreted by:** [REDACTED], PhD, FACMG

**A signed copy of this report is available upon request.**

**Date:** \_\_\_\_\_ **Sent By:** \_\_\_\_\_ **Sent To:** \_\_\_\_\_ **QC Review By:** \_\_\_\_\_

*Limitations: This assay allows for microscopic visualization of numerical and structural chromosome abnormalities. The size of structural abnormality that can be detected is >3-10Mb, dependent upon the G-band resolution obtained from this specimen. For the purposes of this report, band level is defined as the number of G-bands per haploid genome. It is documented here as "band level", i.e., the range of bands determined from the four karyograms in this assay. Detection of heterogeneity of clonal cell populations in this specimen (i.e., mosaicism) is limited by the number of metaphase cells examined, documented here as "# of cells counted".*

*This assay was conducted solely for listed investigator/institution. The results may not be relied upon by any other party without the prior written consent of the Director of the WiCell Cytogenetics Laboratory. The results of this assay are for research use only. If the results of this assay are to be used for any other purpose, contact the Director of the WiCell Cytogenetics Laboratory.*

*Unless otherwise mutually agreed in writing, the services provided to you hereunder by WiCell Research Institute, Inc. ("WiCell") are governed solely by WiCell's Terms and Conditions of Service, found at [www.wicell.org/privacyandterms](http://www.wicell.org/privacyandterms). Any terms you may attach to a purchase order or other document that are inconsistent, add to, or conflict with WiCell's Terms and Conditions of Service are null and void and of no legal force or effect.*

# Short Tandem Repeat Analysis

Department of Pathology and Laboratory Medicine  
TRIP Laboratory (Molecular)  
<http://www.pathology.wisc.edu/research/trip>

WiCell®  
info@wicell.org  
(888) 204-1782

**Sample Report:**

12683-STR  
**Sample Name on Tube:** 12683-STR  
47.9 ng/μL, (A260/280=2.03)  
**Sample Type:** Cells  
**Cell Count:** ~2 million cells

**Requestor:**

WiCell Research Institute  
Quality Department

**Sample Date:** N/A

**Receive Date:** 08/14/17  
**Assay Date:** 08/16/17  
**File Name:** STR 170817 wmr  
**Report Date:** 08/21/17

| STR Locus  | STR Genotype Repeat #                                                                                         | STR Genotype |
|------------|---------------------------------------------------------------------------------------------------------------|--------------|
| FGA        | 16-18,18.2,19,19.2,20,20.2,21,21.2,22, 22.2, 23, 23.2, 24, 24.2, 25, 25.2, 26-30, 31.2, 43.2, 44.2,45.2, 46.2 | 26,28        |
| TPOX       | 6-13                                                                                                          | 10,11        |
| D8S1179    | 7-18                                                                                                          | 8,14         |
| vWA        | 10-22                                                                                                         | 17,17        |
| Amelogenin | X,Y                                                                                                           | X,X          |
| Penta_D    | 2.2, 3.2, 5, 7-17                                                                                             | 9,13         |
| CSF1PO     | 6-15                                                                                                          | 11,11        |
| D16S539    | 5, 8-15                                                                                                       | 12,13        |
| D7S820     | 6-14                                                                                                          | 9,11         |
| D13S317    | 7-15                                                                                                          | 9,9          |
| D5S818     | 7-16                                                                                                          | 11,12        |
| Penta_E    | 5-24                                                                                                          | 11,14        |
| D18S51     | 8-10, 10.2, 11-13, 13.2, 14-27                                                                                | 13,13        |
| D21S11     | 24,24.2,25,25.2,26-28,28.2,29,29.2, 30, 30.2,31, 31.2,32,32.2,33,33.2, 34,34.2,35,35.2,36-38                  | 30,30        |
| TH01       | 4-9,9.3,10-11,13.3                                                                                            | 9.3,9.3      |
| D3S1358    | 12-20                                                                                                         | 13,16        |

**Results:** Based on the 12683-STR cells submitted by WiCell QA dated and received on 08/14/17, this sample (Label on Tube: 12683-STR) exactly matches the STR profile of the human stem cell line WA09 comprising 24 allelic polymorphisms across the 15 STR loci analyzed.

**Interpretation:** No STR polymorphisms other than those corresponding to the human WA09 stem cell line were detected and the concentration of DNA required to achieve an acceptable STR genotype (signal/ noise) was equivalent to that required for the standard procedure (~1 ng/amplification reaction) from human genomic DNA. This result suggests that the 12683-STR sample submitted corresponds to the WA09 stem cell line and was not contaminated with any other human stem cells or a significant amount of mouse feeder layer cells.

**Sensitivity:** Sensitivity limits for detection of STR polymorphisms unique to either this or other human stem cell lines is ~2-5%.

X<sub>RMB</sub>

Digitally Signed on 08/23/17

X<sub>WMR</sub>

Digitally Signed on 08/23/17

TRIP Laboratory, Molecular

PhD, Director / Co-Director  
UWHC Molecular Diagnostics Laboratory / UWSMPH TRIP Laboratory

# Native Product Sterility Report

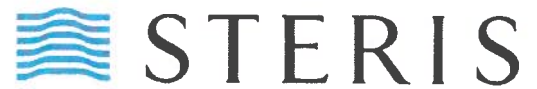

WiCell  
504 S Rosa Rd, Rm 101  
Madison, WI 53719

SAMPLE #: 17071725  
DATE RECEIVED: 27-Jul-17  
TEST INITIATED: 31-Jul-17  
TEST COMPLETED: 14-Aug-17

SAMPLE NAME / DESCRIPTION: HVRDi001-A-WB66391 12659  
JHU024i-WB66445 12660  
WA09-WB66444 12661  
WA09-WB66446 12662  
UCSD005i-43-1-WB62267 12663  
UCSD008i-44-1-WB66286 12664  
UCSD036i-4-5-WB65173 12665  
UCSD233i-SAD-2-DB26810 12666  
UCSD235i-SAD2-4-DB26816 12667  
iPS(IMR90)-2-WB66447 12668

UNIQUE IDENTIFIER: NA  
PRODUCT REGISTRATION: Human iPS cells

TEST RESULTS:

| # Tested | # Positives (Growth) | - Control   |
|----------|----------------------|-------------|
| 10       | 0                    | 2 Negatives |

TEST SUMMARY:

| # Samples | Media Type | Volume (mL) | Incubation Temperature (° C) | Incubation Duration (Days) |
|-----------|------------|-------------|------------------------------|----------------------------|
| 10        | TSB        | 40          | 20-25                        | 14                         |
| 10        | FTG        | 40          | 30 - 35                      | 14                         |

REFERENCE: Processed according to LAB-003: Sterility Test Procedure  
METHOD VALIDATION / PD #: 000053  
TEST METHODOLOGY: USP - Direct Transfer

COMMENTS: NA

REVIEWED BY

DATE

15 Aug 17

Specific test results may not be indicative of the characteristics of any other samples from the same lot or similar lots. This test report shall not be reproduced, except in full, without prior written approval. Liability is limited to the costs of the tests.

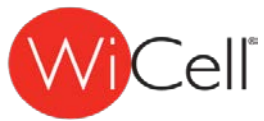

# Mycoplasma Detection Assay Report

Testing Performed by WiCell

Lot Release Testing

July 28, 2017

FORM SOP-QU-004.01

Version F Edition 02

Reported by: OG

Reviewed by: JB

BD Monolight 180

| # | Sample Name          | Reading A |      | A Ave | Reading B |       | B Ave | Ratio B/A | Result   | Comments/Suggestions |
|---|----------------------|-----------|------|-------|-----------|-------|-------|-----------|----------|----------------------|
|   |                      | RLU1      | RLU2 |       | RLU1      | RLU2  |       |           |          |                      |
| 1 | WA09-WB66446 12683   | 486       | 493  | 489.5 | 185       | 184   | 184.5 | 0.38      | Negative |                      |
| 2 | Positive (+) Control | 451       | 453  | 452   | 43705     | 43895 | 43800 | 96.90     | Positive |                      |
| 3 | Negative (-) Control | 803       | 817  | 810   | 89        | 88    | 88.5  | 0.11      | Negative |                      |

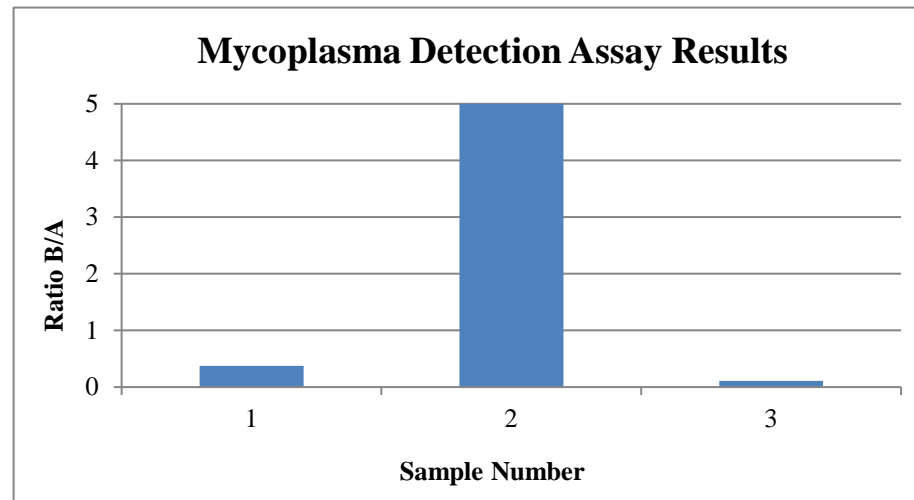

Supplement: mmc4.pdf [file mmc4.pdf]
