# Supplementary material for: Global and single-cell proteomics view of the co-evolution between neural progenitors and breast cancer cells in a co-culture model
Source: PubMed Central journal article supplement (PMC11404160; doi:10.1016/j.ebiom.2024.105325), 2024-09-04
Supplement: mmc3.pdf [file mmc3.pdf]

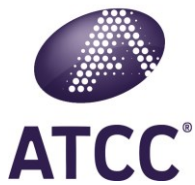

# CERTIFICATE OF ANALYSIS

**ATCC® Number:** HTB-122™  
**Lot Number:** 70023401

**Name:** BT-549\*  
**Description:** Breast Ductal Carcinoma  
**Species:** Human (*Homo sapiens*)  
**Volume/Ampule:** Approximately 1 mL  
**Date Frozen:** 15APR2019  
**Recovery:** A T-75 setup at a seeding density of  $1.5 \times 10^4$  viable cells/cm<sup>2</sup> reaches approximately 20% confluence in 1 day and 100% confluence in 7 days.  
**Product Format:** Cells cryopreserved in the appropriate cryopreservation medium  
**Expiration Date:** Not applicable  
**Storage Conditions:** Vapor phase of liquid nitrogen

\* The vial labels for this lot contain an error in the product name. The correct product name is “BT-549”, while the vial labels for this lot say “BT-5”.

| Test / Method                                                                                                                      | Specification                                   | Result                                          |
|------------------------------------------------------------------------------------------------------------------------------------|-------------------------------------------------|-------------------------------------------------|
| <b>Ampule passage number</b>                                                                                                       | Report results                                  | 41                                              |
| <b>Population doubling level (PDL)</b>                                                                                             | Report results                                  | Not applicable                                  |
| <b>Total cells/ampule</b><br>(Cell count using Trypan Blue stain method)                                                           | Report results                                  | $1.6 \times 10^6$ total cells/ampule            |
| <b>Post-freeze viability</b><br>(Cell count using Trypan Blue stain method)                                                        | ≥ 50.0%                                         | 93.8%                                           |
| <b>Growth properties</b><br>(Visual observation method)                                                                            | Adherent                                        | Adherent                                        |
| <b>Morphology</b><br>(Visual observation method)                                                                                   | Epithelial-like**                               | Epithelial-like                                 |
| <b>Test for mycoplasma contamination</b><br>Hoechst DNA stain (indirect) method<br>Agar culture (direct) method<br>PCR-based assay | None detected<br>None detected<br>None detected | None detected<br>None detected<br>None detected |
| <b>Species determination: COI assay (interspecies)</b>                                                                             | Human                                           | Human                                           |

**ATCC**  
10801 University Boulevard  
Manassas, VA 20110-2209 USA  
www.atcc.org

800-638-6597 or 703-365-2700  
Fax: 703-365-2750  
E-mail: tech@atcc.org  
or contact your local distributor



# CERTIFICATE OF ANALYSIS

**ATCC® Number:** HTB-122™  
**Lot Number:** 70023401

|                                                                                                               |                                                                                                                                                                     |                                                                                                                                                                     |
|---------------------------------------------------------------------------------------------------------------|---------------------------------------------------------------------------------------------------------------------------------------------------------------------|---------------------------------------------------------------------------------------------------------------------------------------------------------------------|
| <b>Species determination: STR analysis (intraspecies)</b>                                                     | <b>Human (Unique DNA Profile)</b><br>TH01: 9.3<br>D5S818: 11<br>D13S317: 11<br>D7S820: 9, 10<br>D16S539: 8<br>CSF1PO: 10, 12<br>Amelogenin: X<br>vWA: 15<br>TPOX: 8 | <b>Human (Unique DNA Profile)</b><br>TH01: 9.3<br>D5S818: 11<br>D13S317: 11<br>D7S820: 9, 10<br>D16S539: 8<br>CSF1PO: 10, 12<br>Amelogenin: X<br>vWA: 15<br>TPOX: 8 |
| <b>Sterility test (BacT/ALERT 3D)</b><br>iAST bottle (aerobic) at 32.5°C<br>iNST bottle (anaerobic) at 32.5°C | No growth<br>No growth                                                                                                                                              | No growth<br>No growth                                                                                                                                              |
| <b>Human pathogenic virus testing</b><br>(PCR-based assay for HIV, HepB, HPV, EBV, and CMV)                   | Report results                                                                                                                                                      | HIV – None detected<br>HepB – None detected<br>HPV – None detected<br>EBV – None detected<br>CMV – None detected                                                    |

\*\* Epithelial-like: Any adherent cells of a polygonal shape with clear, sharp boundaries between them.

**Product meets European Union requirements for production of technical blood products. Components derived from animals as defined by the European Union have been sourced from European Union approved suppliers.**

## Quality Assurance Specialist; Quality Assurance

ATCC hereby represents and warrants that the material provided under this certificate is pure and has been subjected to the tests and procedures specified and that the results described, along with any other data provided in this certificate, are true and correct to the best of the company's knowledge and belief. This certificate does not extend to the growth and/or passage of any living organism or cell line beyond what is supplied within the container received from ATCC.

This product is intended to be used for laboratory research use only. It is not intended for use in humans, animals, or for diagnostics. Appropriate Biosafety Level (BSL) practices should always be used with this material. Refer to the Product Information Sheet for instructions on the correct use of this product.

ATCC products may not be resold, modified for resale, used to provide commercial services, or to manufacture commercial products without prior written agreement from ATCC.

© 2017 ATCC. The ATCC trademark and trade name are owned by the American Type Culture Collection.

**ATCC**  
10801 University Boulevard  
Manassas, VA 20110-2209 USA  
www.atcc.org

800-638-6597 or 703-365-2700  
Fax: 703-365-2750  
E-mail: tech@atcc.org  
or contact your local distributor
